# Supplementary material for: Synthesis and molecular docking studies of a new series of bipyrazol-yl-thiazol-ylidene-hydrazinecarbothioamide derivatives as potential antitubercular agents
Source: Royal Society of Chemistry journal article supplement (doi:10.1039/c6md00085a), 2016-01-01

## Synthesis and molecular docking studies of new series of bipyrazol-yl-thiazol-ylidene-hydrazinecarbothioamide derivatives as potential antitubercular agents

Pratima P. Mogle, Rohan J. Meshram, Shrikant V. Hese, Rahul D. Kamble, Sonali S. Kamble, Rajesh N. Gacche, Bhaskar S. Dawane\*

- 
- a. School of Chemical Sciences, Swami Ramanand Teerth Marathwada University, Nanded (MS), India 431606.*  
*b. School of Life Sciences, Swami Ramanand Teerth Marathwada University, Nanded (MS), India.*

## 1. Chemistry

1.1 Probable mechanism for the BEC (pH-12.5) catalyzed synthesis of intermediate bipyrzolo-yl-thiazol-one derivatives via Darzen reaction (**5a-r**).

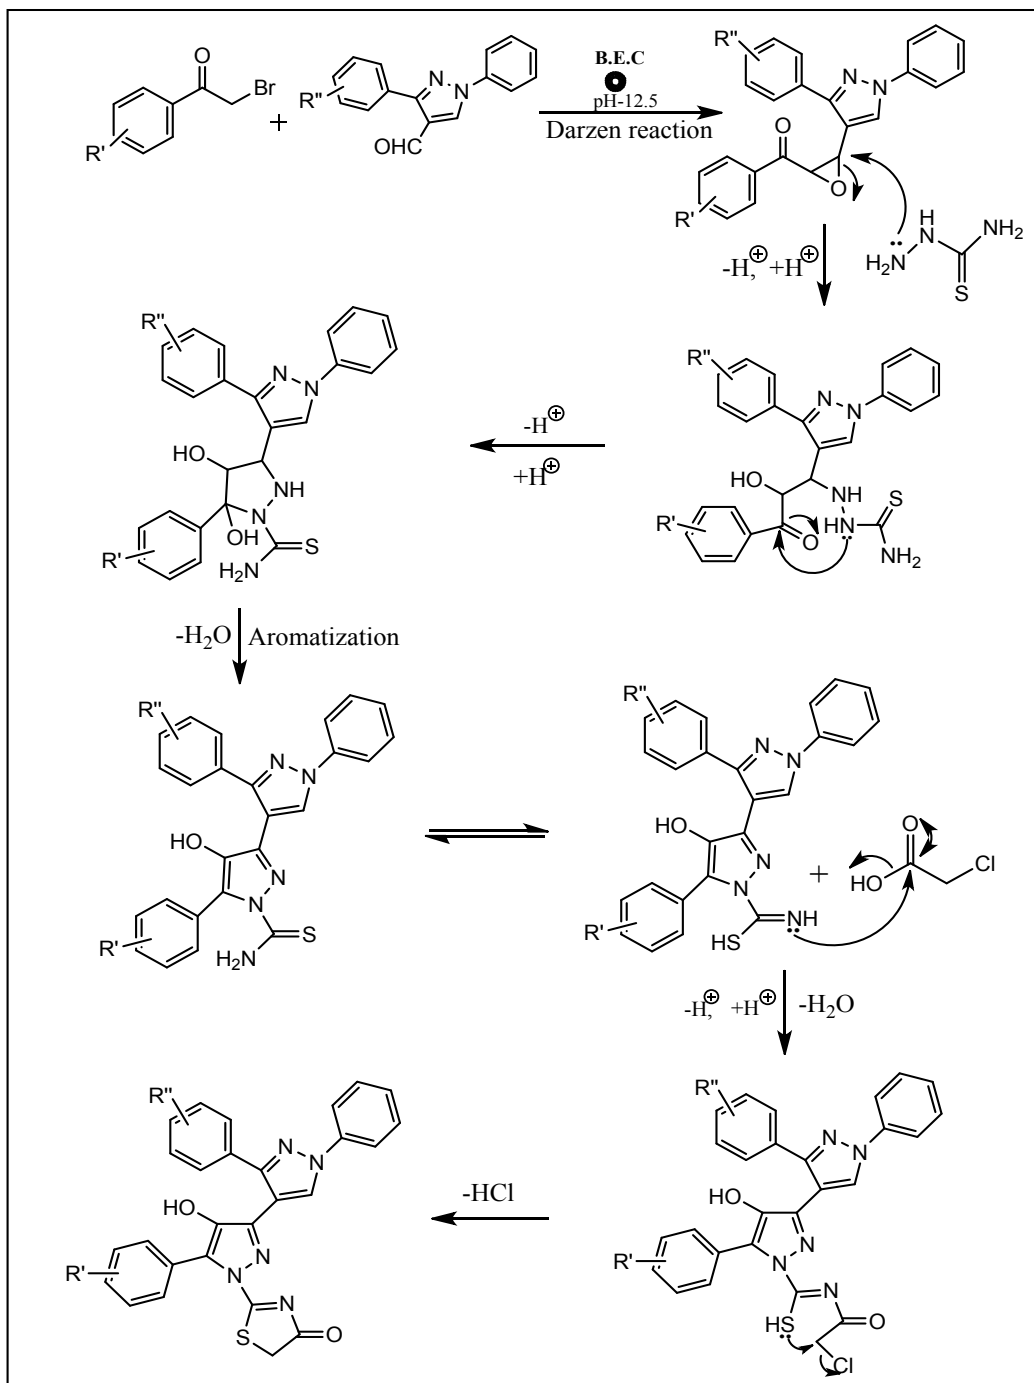

## 1.2 Characterizations

### 1.2.1 2-(3'-(4-chlorophenyl)-4-hydroxy-5-(4-nitrophenyl)-1'-phenyl-1H,1'H-[3,4'-bipyrazol]-1-yl)thiazol-4(5H)-one (**5k**)

M.P. 163-165°C; Yield, 89%; IR (KBr,  $\text{cm}^{-1}$ ): 3462 (-OH), 3033 (Ar, C-H), 2855 (aliphatic, C-H), 1681 ( $>\text{C}=\text{O}$ , amidic), 1643 (-C=N), 1268 (C-S-C);  $^1\text{H}$  NMR (400 MHz, DMSO- $d_6$ ,  $\delta$ , ppm): 11.32 (s, 1H, -OH), 9.18 (s, 1H,  $\text{C}_5\text{-H}$  of pyrazole), 8.48-7.42 (m, 13H, Ar-H), 4.56 (s, 2H,  $\text{CH}_2$ ); EIMS: 556 [M<sup>+</sup>]; Elemental Analysis. Calculated (found) for  $\text{C}_{27}\text{H}_{17}\text{ClN}_6\text{O}_4\text{S}$ : % C, 58.22 (58.20); H, 3.08 (3.10); Cl, 6.37 (6.35), N, 15.09 (15.07); O, 11.49 (11.51), S, 5.76 (5.74).

### 1.2.2 2-(3'-(4-bromophenyl)-4-hydroxy-5-(4-nitrophenyl)-1'-phenyl-1H,1'H-[3,4'-bipyrazol]-1-yl)thiazol-4(5H)-one (**5l**)

M.P. 168-170°C; Yield, 86%; IR (KBr,  $\text{cm}^{-1}$ ): 3492 (-OH), 3013 (Ar, C-H), 2977 (aliphatic, C-H), 1686 ( $>\text{C}=\text{O}$ , amidic), 1626 (-C=N), 1265 (C-S-C);  $^1\text{H}$  NMR (400 MHz, DMSO- $d_6$ ,  $\delta$ , ppm): 11.54 (s, 1H, -OH), 9.08 (s, 1H,  $\text{C}_5\text{-H}$  of pyrazole), 8.55-7.38 (m, 13H, Ar-H), 4.46 (s, 2H,  $\text{CH}_2$ ); EIMS: 601 [M<sup>+</sup>]; Elemental Analysis. Calculated (found) for  $\text{C}_{27}\text{H}_{17}\text{BrN}_6\text{O}_4\text{S}$ : % C, 53.92 (53.90); H, 2.85 (2.83); Br, 13.29 (13.27), N, 13.97 (13.95); O, 10.64 (10.62), S, 5.33 (5.31).

### 1.2.3 2-(3'-(4-bromophenyl)-4-hydroxy-5-(3-nitrophenyl)-1'-phenyl-1H,1'H-[3,4'-bipyrazol]-1-yl)thiazol-4(5H)-one (**5m**)

M.P. 168-170°C; Yield, 84%; IR (KBr,  $\text{cm}^{-1}$ ): 3490 (-OH), 3010 (Ar, C-H), 2970 (aliphatic, C-H), 1688 ( $>\text{C}=\text{O}$ , amidic), 1649 (-C=N), 1246 (C-S-C);  $^1\text{H}$  NMR (400 MHz, DMSO- $d_6$ ,  $\delta$ , ppm): 11.51 (s, 1H, -OH), 9.13 (s, 1H,  $\text{C}_5\text{-H}$  of pyrazole), 8.53-7.35 (m, 13H, Ar-H), 4.49 (s, 2H,  $\text{CH}_2$ ); EIMS: 601 [M<sup>+</sup>]; Elemental Analysis. Calculated (found) for  $\text{C}_{27}\text{H}_{17}\text{BrN}_6\text{O}_4\text{S}$ : % C, 53.92 (53.90); H, 2.85 (2.83); Br, 13.29 (13.27), N, 13.97 (13.95); O, 10.64 (10.62), S, 5.33 (5.31).

### 1.2.4 2-(4-hydroxy-3',5-bis(4-nitrophenyl)-1'-phenyl-1H,1'H-[3,4'-bipyrazol]-1-yl)thiazol-4(5H)-one (**5n**)

M.P. 163-165°C; Yield, 88%; IR (KBr,  $\text{cm}^{-1}$ ): 3495 (-OH), 3014 (Ar, C-H), 2957 (aliphatic, C-H), 1689 ( $>\text{C}=\text{O}$ , amidic), 1637 (-C=N), 1271 (C-S-C);  $^1\text{H}$  NMR (400 MHz, DMSO- $d_6$ ,  $\delta$ , ppm): 11.51 (s, 1H, -OH), 9.04 (s, 1H,  $\text{C}_5\text{-H}$  of pyrazole), 8.54-7.46 (m, 13H, Ar-H), 4.47 (s, 2H,  $\text{CH}_2$ ); EIMS: 567 [ $\text{M}^+$ ]; Elemental Analysis. Calculated (found) for  $\text{C}_{27}\text{H}_{17}\text{N}_7\text{O}_6\text{S}$ : % C, 57.14 (57.12); H, 3.02 (3.00); N, 17.28 (17.30); O, 16.91 (16.93); S, 5.65 (5.63).

**1.2.5** 2-(4-hydroxy-3'-(3-nitrophenyl)-5-(4-nitrophenyl)-1'-phenyl-1H,1'H-[3,4'-bipyrazol]-1-yl)thiazol-4(5H)-one (**5o**)

M.P. 167-169°C; Yield, 88%; IR (KBr,  $\text{cm}^{-1}$ ): 3491 (-OH), 3011 (Ar, C-H), 2952 (aliphatic, C-H), 1687 ( $>\text{C}=\text{O}$ , amidic), 1640 (-C=N), 1256 (C-S-C);  $^1\text{H}$  NMR (400 MHz, DMSO- $d_6$ ,  $\delta$ , ppm): 11.48 (s, 1H, -OH), 9.16 (s, 1H,  $\text{C}_5\text{-H}$  of pyrazole), 8.51-7.45 (m, 13H, Ar-H), 4.48 (s, 2H,  $\text{CH}_2$ ); EIMS: 567 [ $\text{M}^+$ ]; Elemental Analysis. Calculated (found) for  $\text{C}_{27}\text{H}_{17}\text{N}_7\text{O}_6\text{S}$ : % C, 57.14 (57.12); H, 3.02 (3.00); N, 17.28 (17.30); O, 16.91 (16.93); S, 5.65 (5.63).

**1.2.6** 2-(4-hydroxy-3',5-bis(3-nitrophenyl)-1'-phenyl-1H,1'H-[3,4'-bipyrazol]-1-yl)thiazol-4(5H)-one (**5p**)

M.P. 169-171°C; Yield, 89%; IR (KBr,  $\text{cm}^{-1}$ ): 3493 (-OH), 3013 (Ar, C-H), 2955 (aliphatic, C-H), 1691 ( $>\text{C}=\text{O}$ , amidic), 1635 (-C=N), 1260 (C-S-C);  $^1\text{H}$  NMR (400 MHz, DMSO- $d_6$ ,  $\delta$ , ppm): 11.56 (s, 1H, -OH), 9.18 (s, 1H,  $\text{C}_5\text{-H}$  of pyrazole), 8.57-7.50 (m, 13H, Ar-H), 4.45 (s, 2H,  $\text{CH}_2$ ); EIMS: 567 [ $\text{M}^+$ ]; Elemental Analysis. Calculated (found) for  $\text{C}_{27}\text{H}_{17}\text{N}_7\text{O}_6\text{S}$ : % C, 57.14 (57.12); H, 3.02 (3.00); N, 17.28 (17.30); O, 16.91 (16.93); S, 5.65 (5.63).

**1.2.7** 2-(4-hydroxy-5-(3-nitrophenyl)-3'-(4-nitrophenyl)-1'-phenyl-1H,1'H-[3,4'-bipyrazol]-1-yl)thiazol-4(5H)-one (**5q**)

M.P. 171-173°C; Yield, 88%; IR (KBr,  $\text{cm}^{-1}$ ): 3489 (-OH), 3017 (Ar, C-H), 2963 (aliphatic, C-H), 1689 ( $>\text{C}=\text{O}$ , amidic), 1629 (-C=N), 1250 (C-S-C);  $^1\text{H}$  NMR (400 MHz, DMSO- $d_6$ ,  $\delta$ , ppm):

11.59 (s, 1H, -OH), 9.28 (s, 1H, C<sub>5</sub>-H of pyrazole), 8.55-7.50 (m, 13H, Ar-H), 4.41 (s, 2H, CH<sub>2</sub>); EIMS: 567 [M<sup>+</sup>]; Elemental Analysis. Calculated (found) for C<sub>27</sub>H<sub>17</sub>N<sub>7</sub>O<sub>6</sub>S: % C, 57.14 (57.12); H, 3.02 (3.00); N, 17.28 (17.30); O, 16.91 (16.93); S, 5.65 (5.63).

**1.2.8** 2-(3',5-bis(4-bromophenyl)-4-hydroxy-1'-phenyl-1H,1'H-[3,4'-bipyrazol]-1-yl) thiazol-4(5H)-one (**5r**)

M.P. 173-175°C; Yield, 80%; IR (KBr, cm<sup>-1</sup>): 3478 (-OH), 3038 (Ar, C-H), 2966 (aliphatic, C-H), 1690 (>C=O, amidic), 1620 (-C=N), 1277 (C-S-C); <sup>1</sup>H NMR (400 MHz, DMSO-d<sub>6</sub>, δ, ppm): 11.40 (s, 1H, -OH), 9.21 (s, 1H, C<sub>5</sub>-H of pyrazole), 8.58-7.45 (m, 13H, Ar-H), 4.51 (s, 2H, CH<sub>2</sub>); EIMS: 635 [M<sup>+</sup>]; Elemental Analysis. Calculated (found) for C<sub>27</sub>H<sub>17</sub>Br<sub>2</sub>N<sub>5</sub>O<sub>2</sub>S: % C, 51.04 (51.02); H, 2.70 (2.68); Br, 25.15(25.17); N, 11.02 (11.00); O, 5.04 (5.02), S, 5.05 (5.03).

**1.3** IR, <sup>1</sup>H NMR, <sup>13</sup>C NMR, Mass spectrum of synthesized derivatives

## 1.3.1 IR of compound 5c

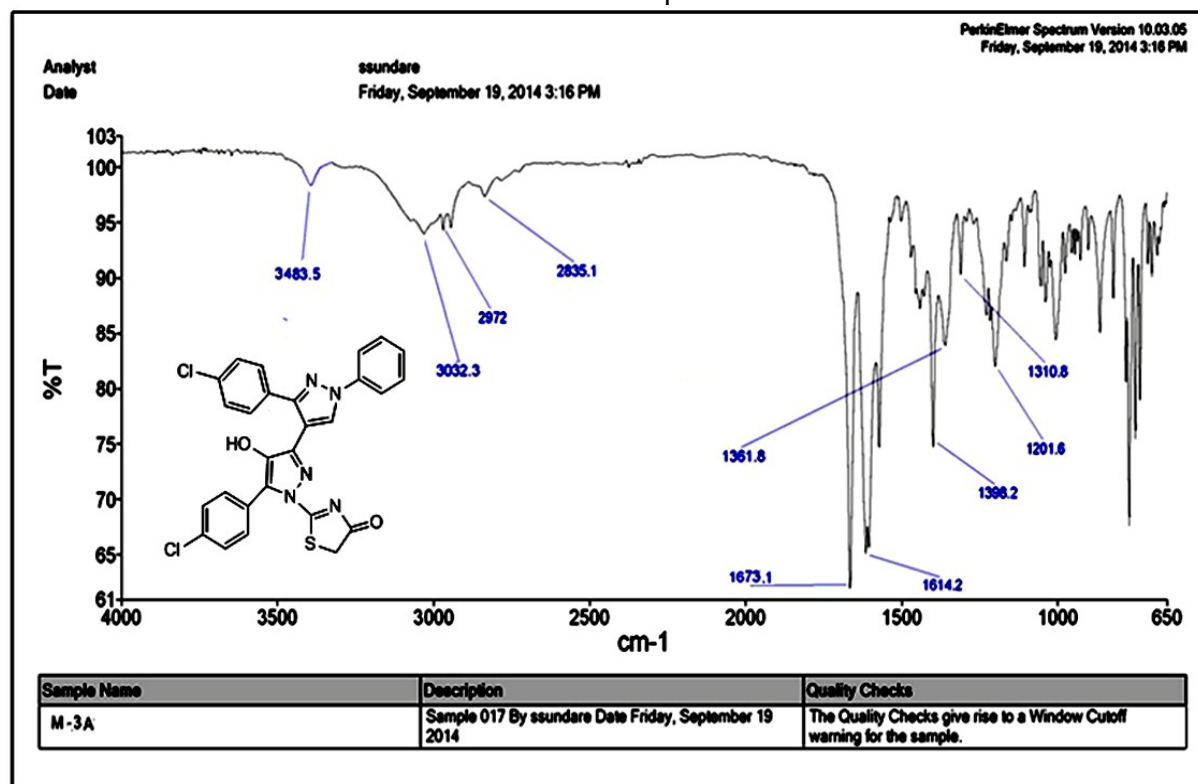1.3.2 <sup>1</sup>H NMR of compound 5c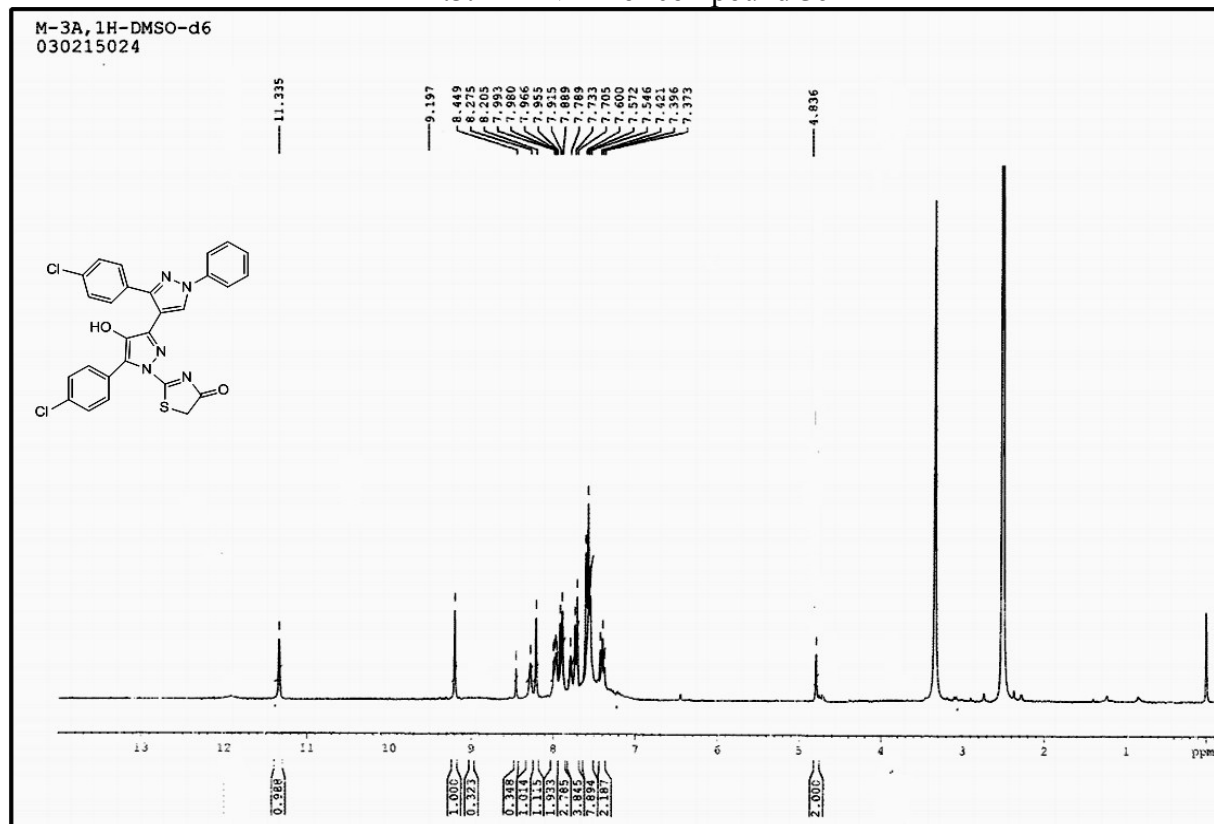

## 1.3.3 Mass of compound 5c

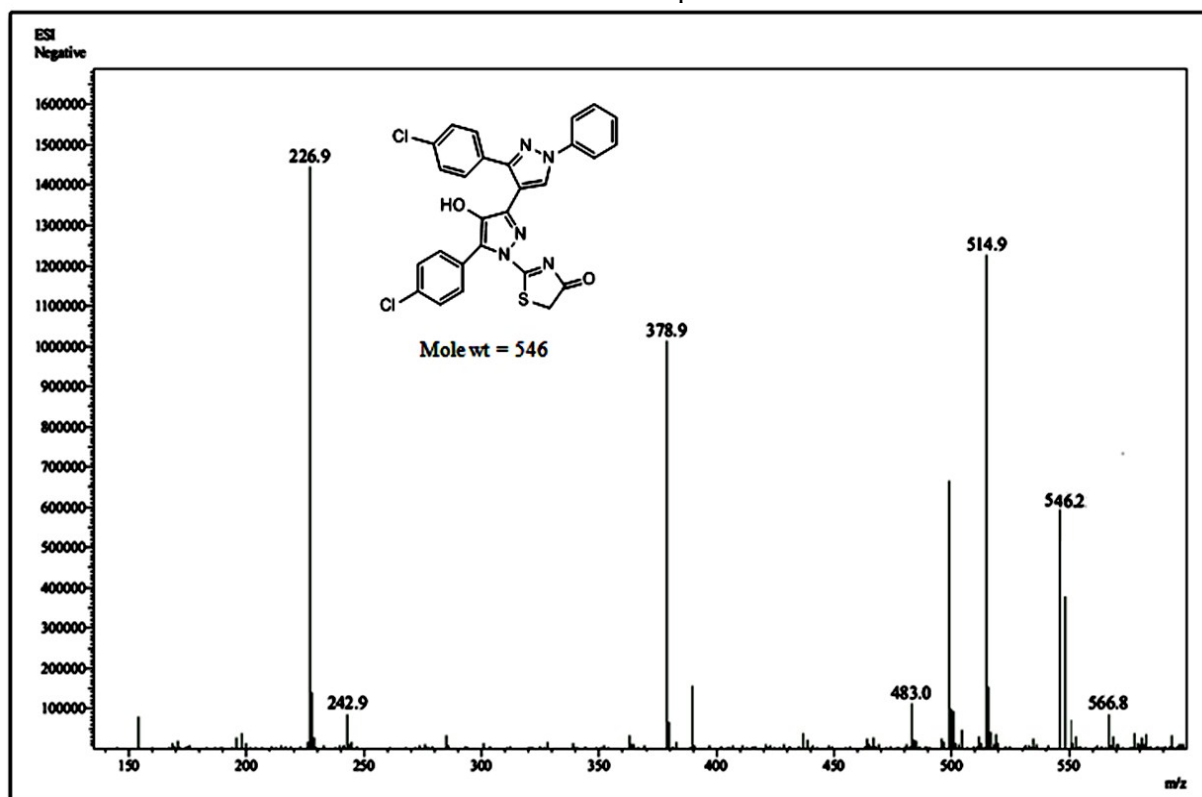

## 1.3.4 IR of compound 5e

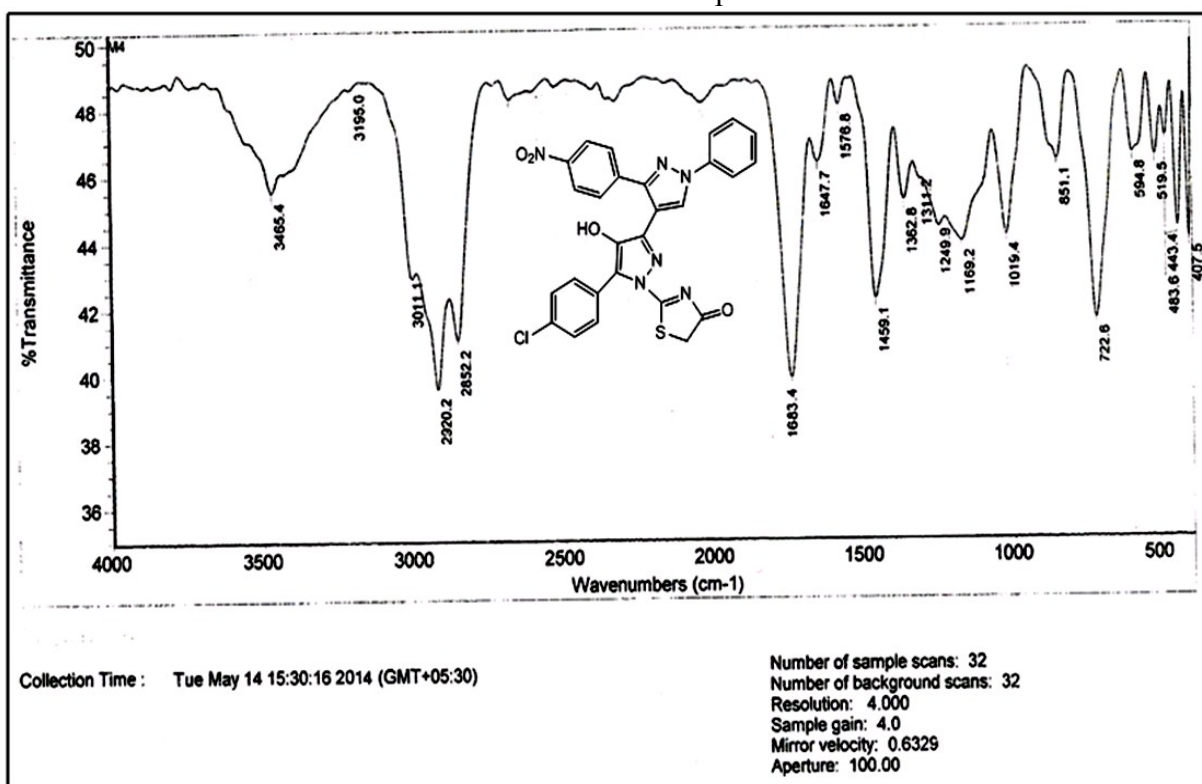

1.3.5  $^1\text{H}$  NMR of compound **5e**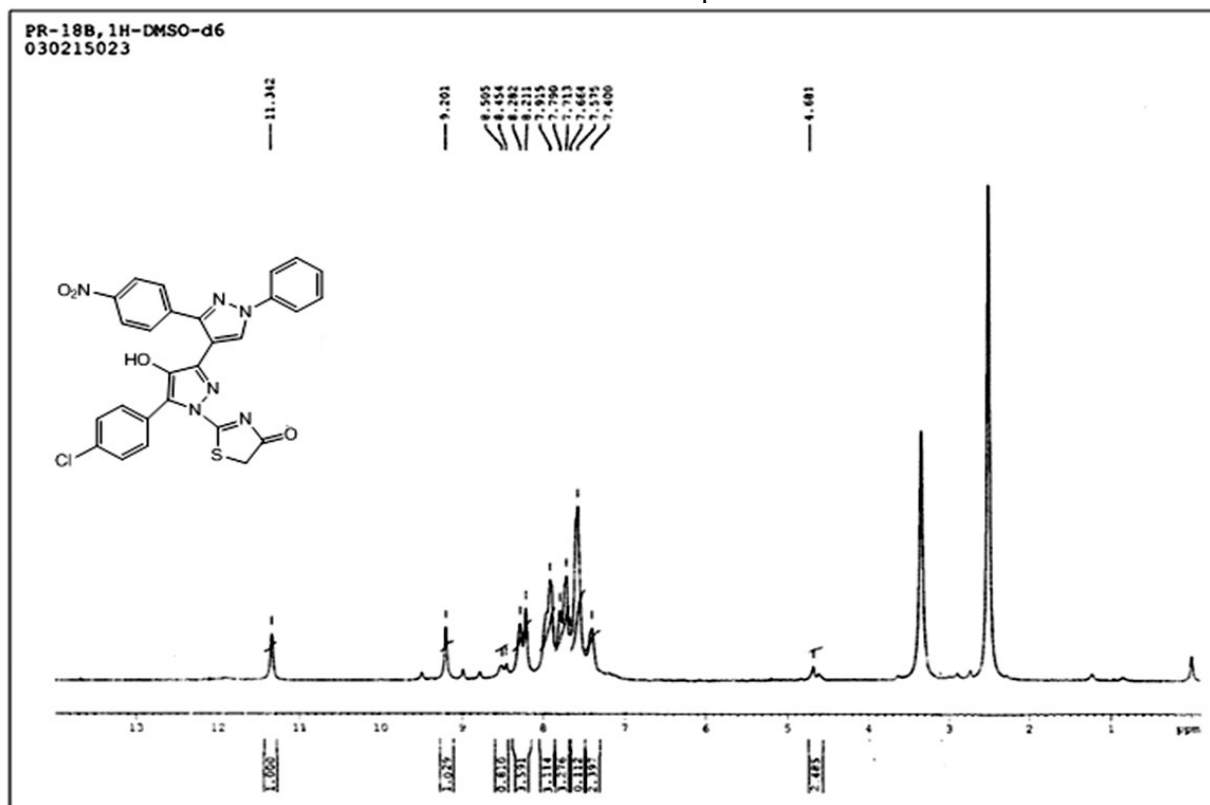1.3.6 Mass of compound **5e**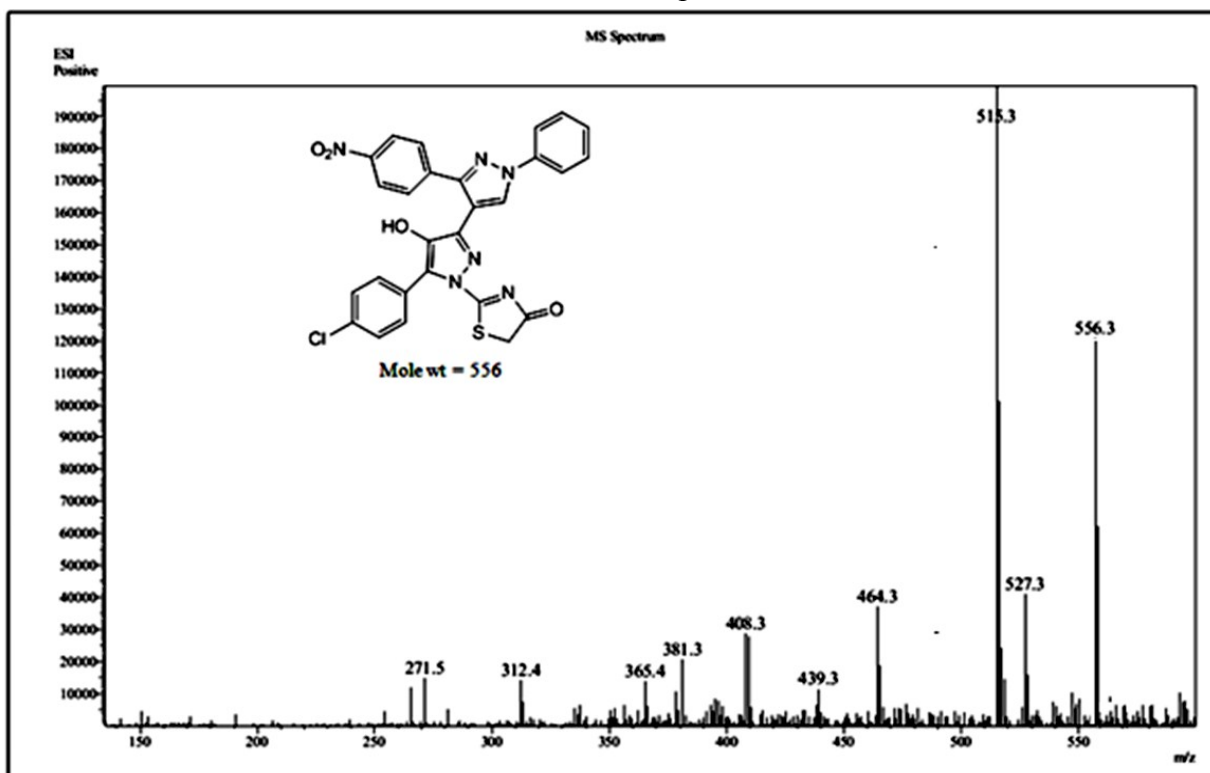



## 1.3.7 IR of compound 6c

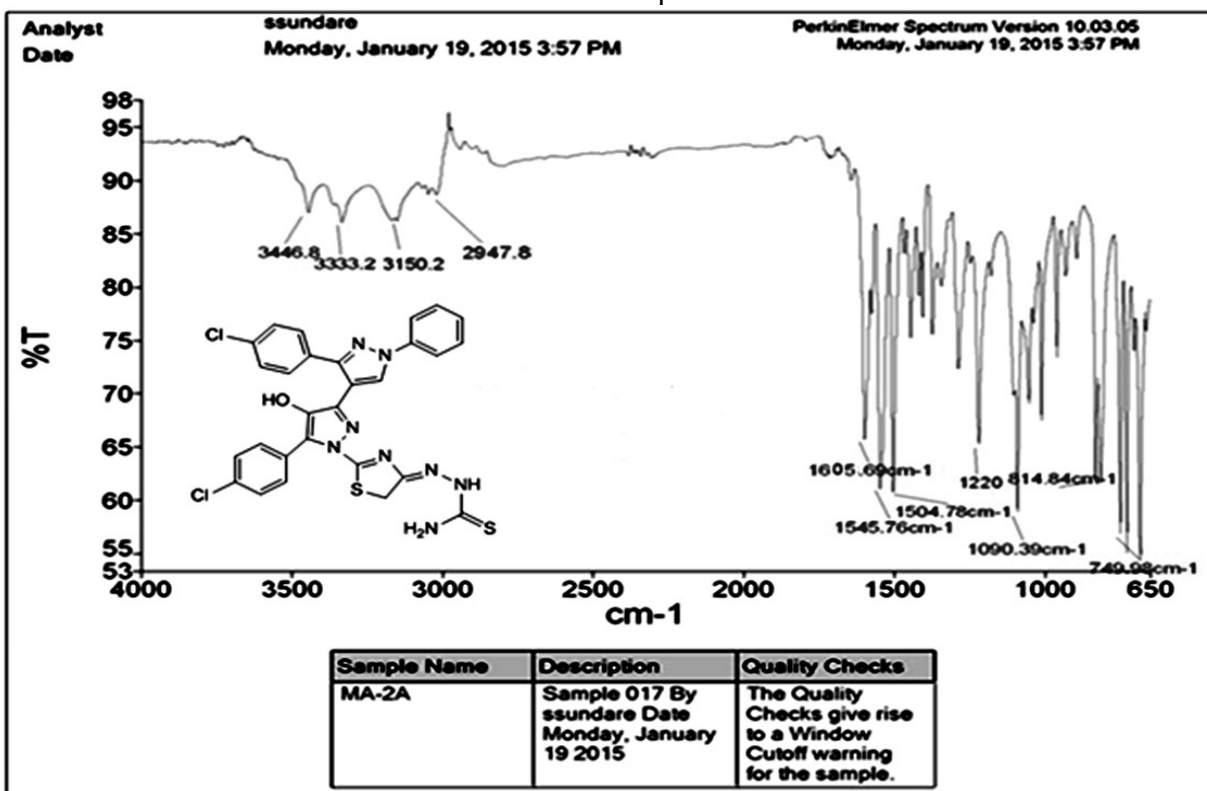1.3.8 <sup>1</sup>H NMR of compound 6c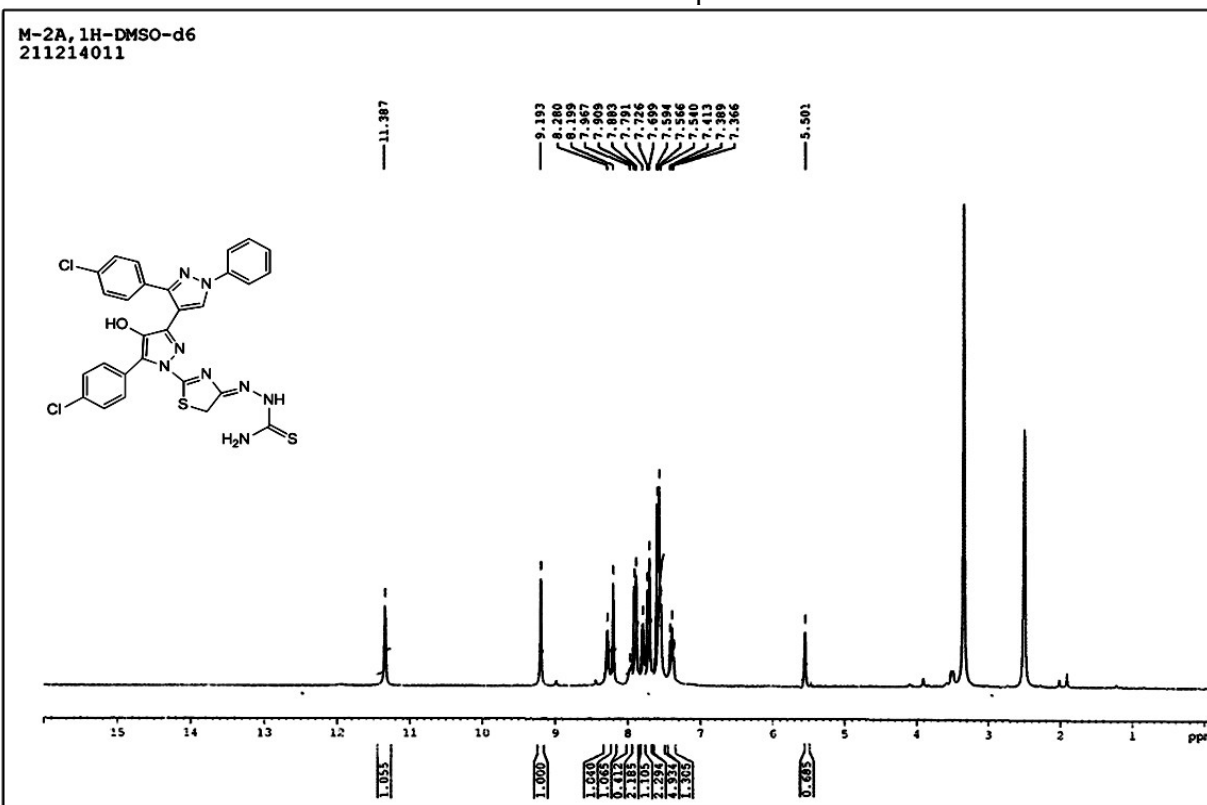

1.3.9  $^{13}\text{C}$  NMR of compound 6c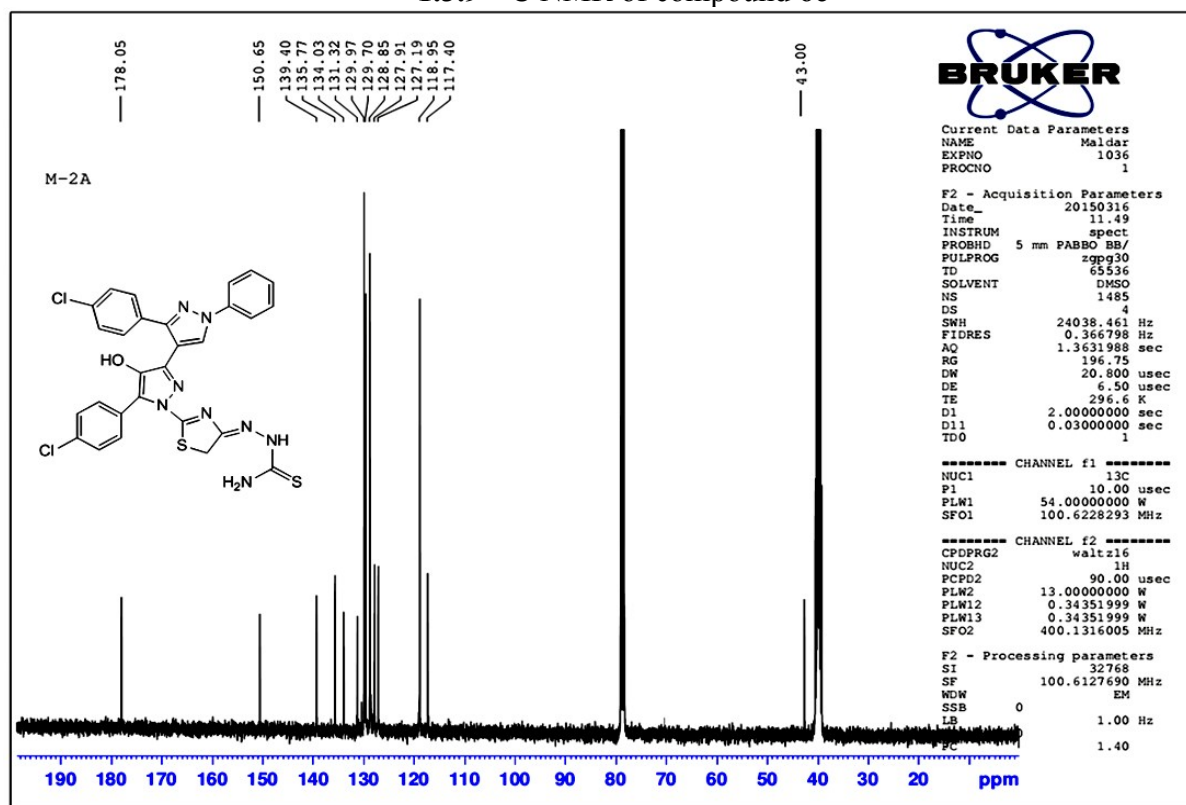

## 1.3.10 Mass of compound 6c

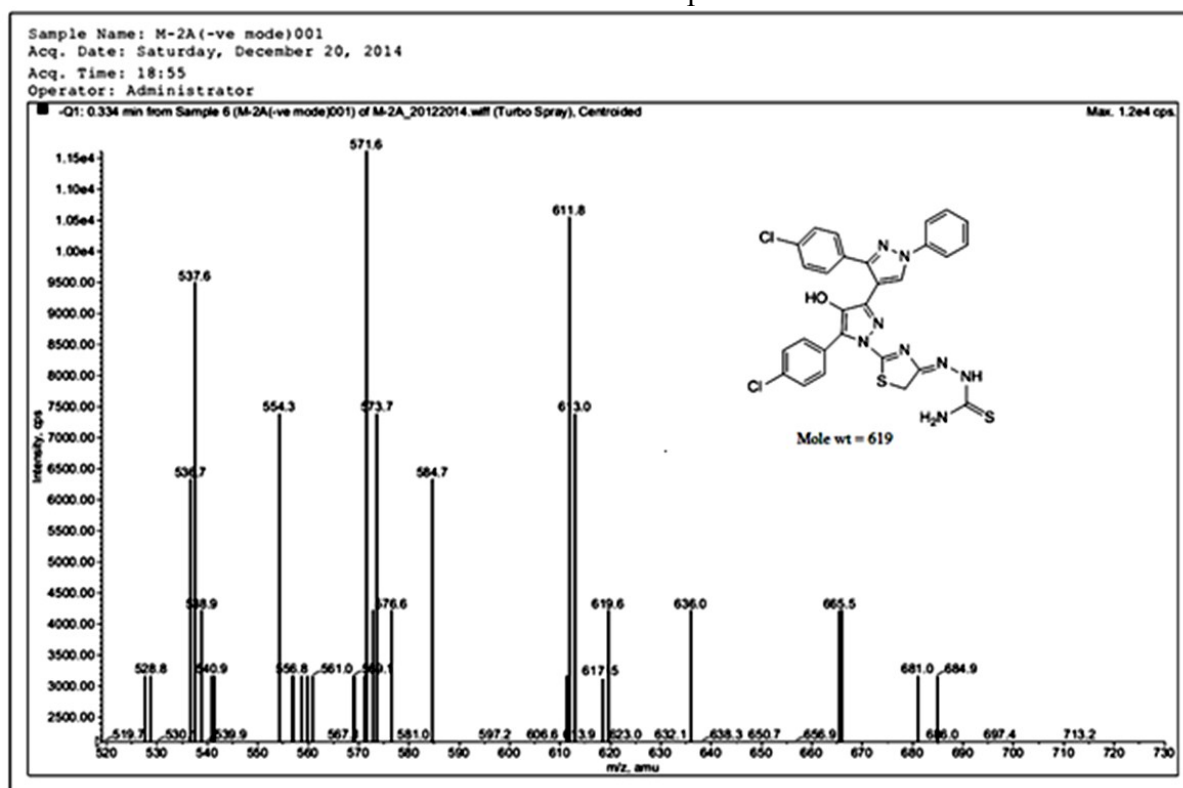

## 1.3.11 IR of compound 6e

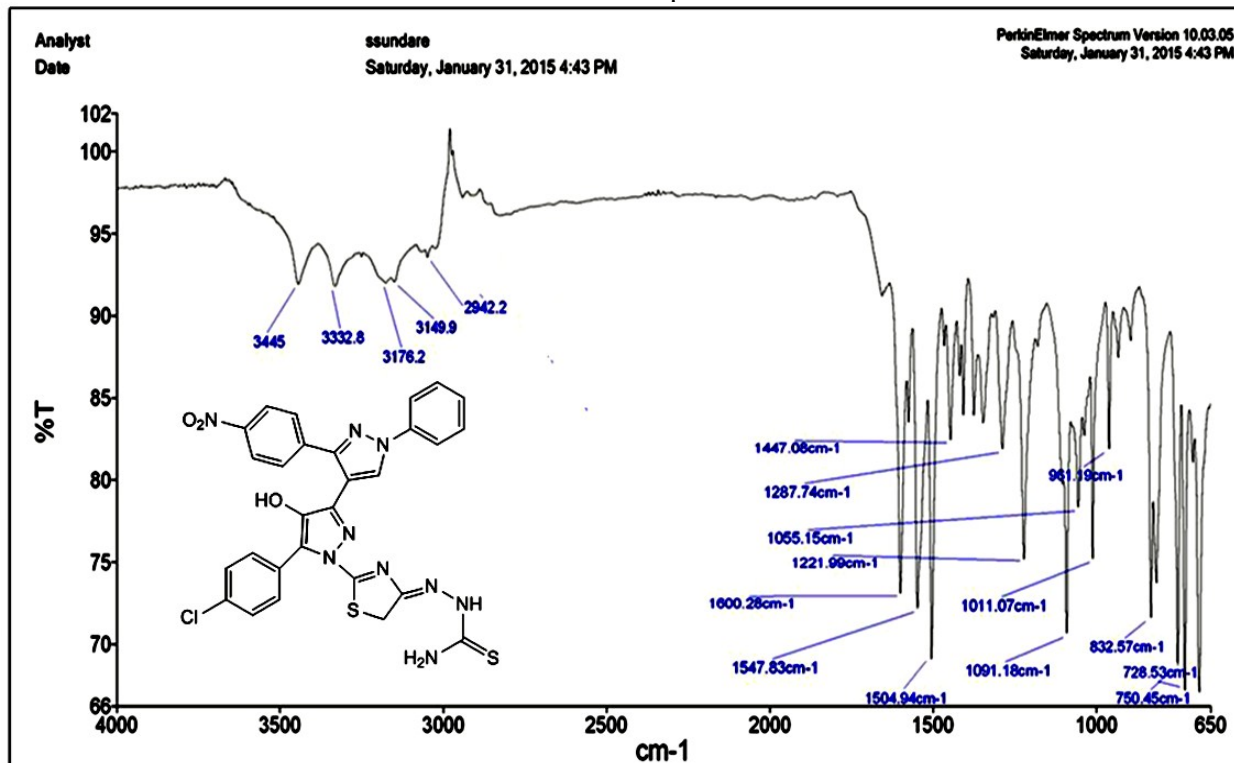1.3.12 <sup>1</sup>H NMR of compound 6e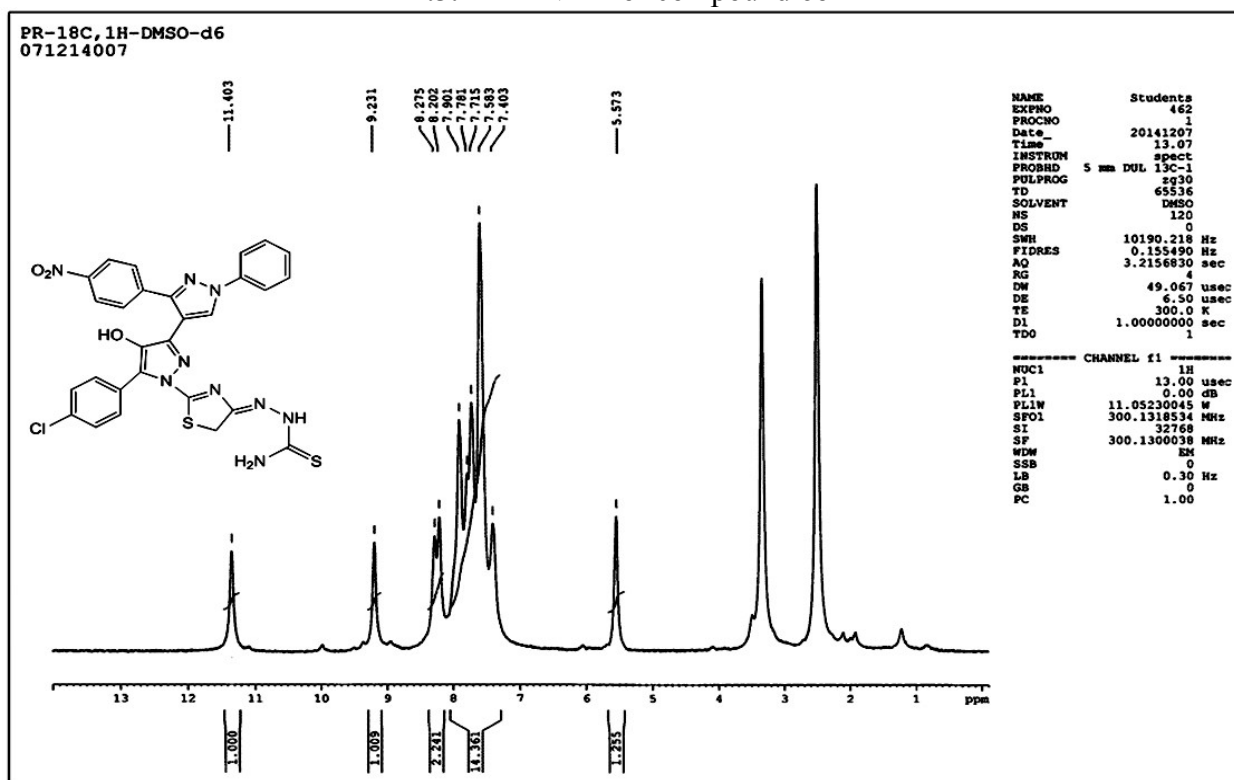

1.3.13  $^{13}\text{C}$  NMR of compound 6e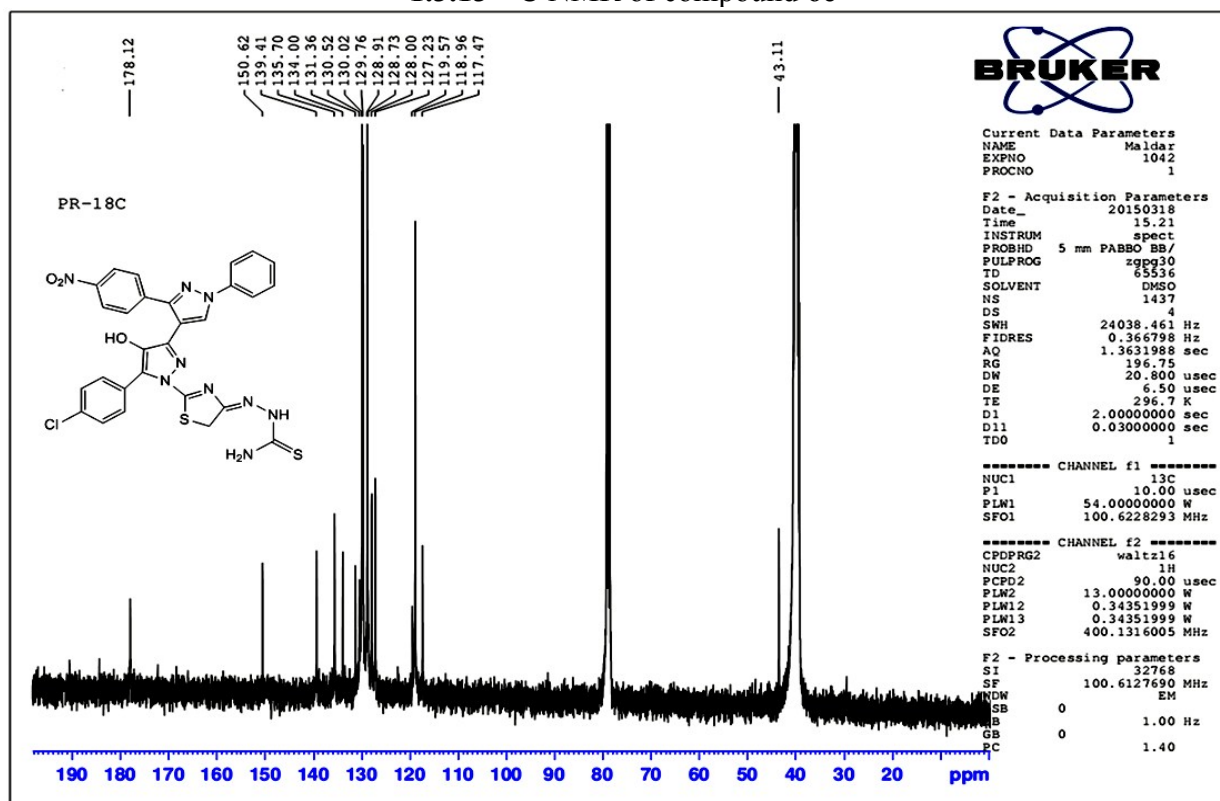

## 1.3.14 MASS of compound 6e

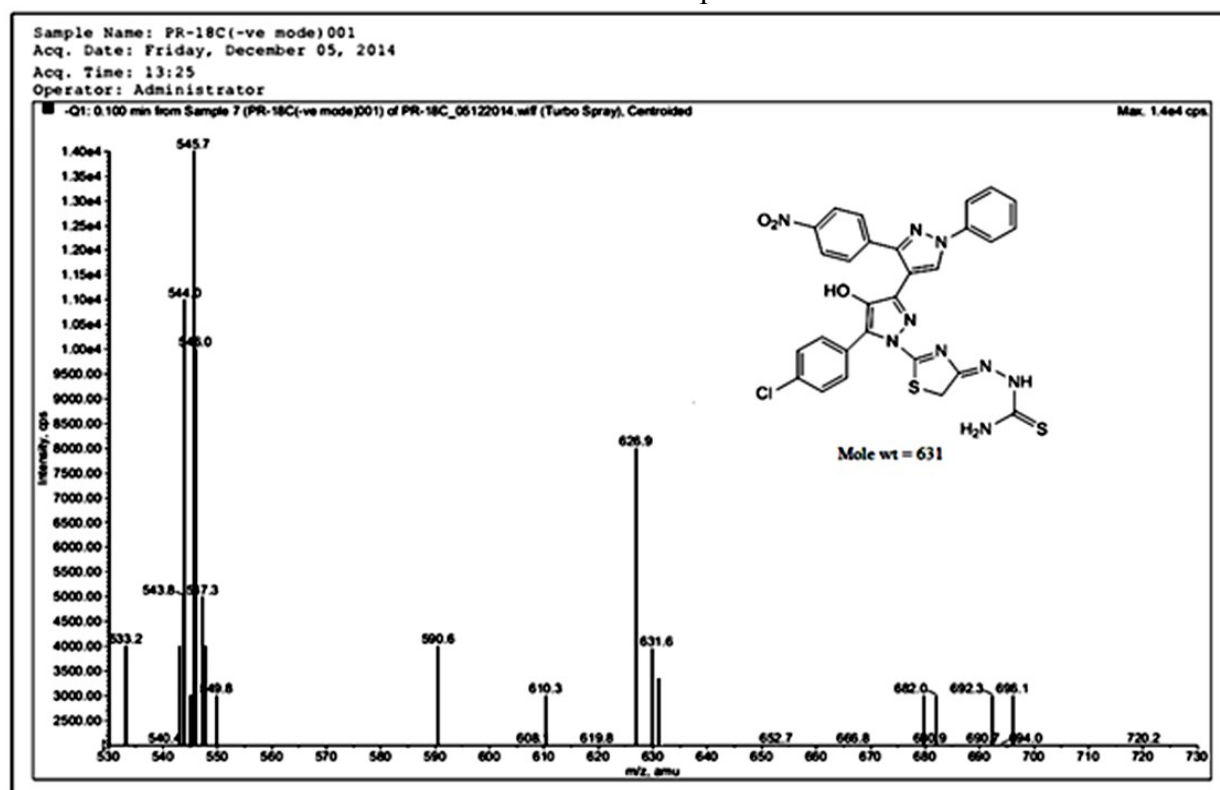

Supplement: c6md00085a1.pdf [file c6md00085a1.pdf]
